# Supplementary material for: OpenFOAM-avalanche 2312: depth-integrated models beyond dense-flow avalanches
Source: Copernicus journal article supplement (doi:10.5194/gmd-17-6545-2024), 2024-09-02
Supplement: Supplementary file [file gmd-17-6545-2024-supplement-title-page.pdf › gmd-17-6545-2024-supplement-title-page.pdf]

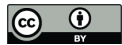

## *Supplement of*

# **OpenFOAM-avalanche 2312: depth-integrated models beyond dense-flow avalanches**

**Matthias Rauter and Julia Kowalski**

*Correspondence to:* Julia Kowalski ([kowalski@mbd.rwth-aachen.de](mailto:kowalski@mbd.rwth-aachen.de))

- [gmd-17-6545-2024-supplement-title-page.pdf](#)
- [avalanche](#)
  - Allwclean
  - Allwmake
  - README.md
  - applications
    - \* Allwmake
    - \* solvers
    - \* utilities
  - src
    - \* Allwclean
    - \* Allwmake
    - \* avalanche
  - tutorials
    - \* Allclean
    - \* Allcollect
    - \* Allrun
    - \* deposition
    - \* entrainment
    - \* gridToSTL
    - \* montereycanyon
    - \* releaseAreaMapping
    - \* simpleslope
    - \* wolfsgrobe
    - \* wolfsgrobe\_mixed
- [manual\\_openfoam\\_avalanche2312.pdf](#)

The copyright of individual parts of the supplement might differ from the article licence.
